# Supplementary material
Source: PubMed Central journal article supplement (PMC5718956)
Supplement: NIHMS911187-supplement.pdf [file NIHMS911187-supplement.pdf]

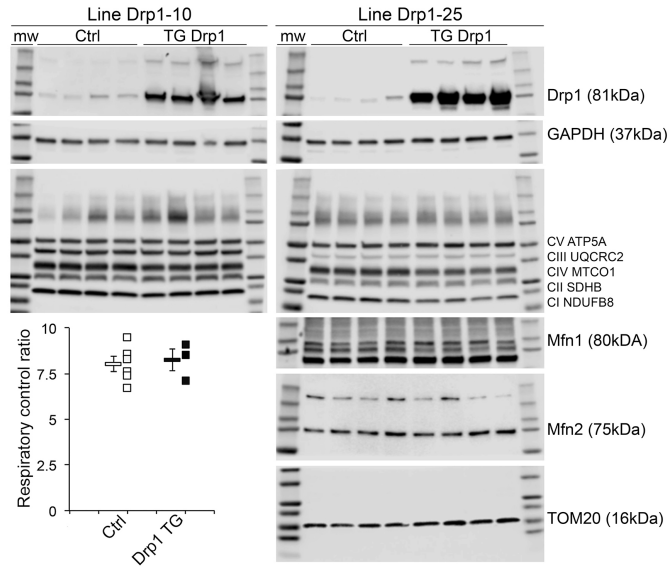

**Figure S1.** *Characterization of two lines of cardiac Drp1 transgenic mice, Related to Figure 1.* On the left are immunoblots and mitochondrial respiration studies from 10-fold normal expressing TG Drp1-10. On the right are immunoblot data from 25-fold normal expressing TG Drp1-25, which is the same line described in Figure 1. TG Drp1-25 results here are different mice than in Figure 1. TOM20 is translocase of outer mitochondrial membrane 20; multiple bands labeled CI-CV are respiratory complex subunits as annotated. No significant difference (*t*-test).

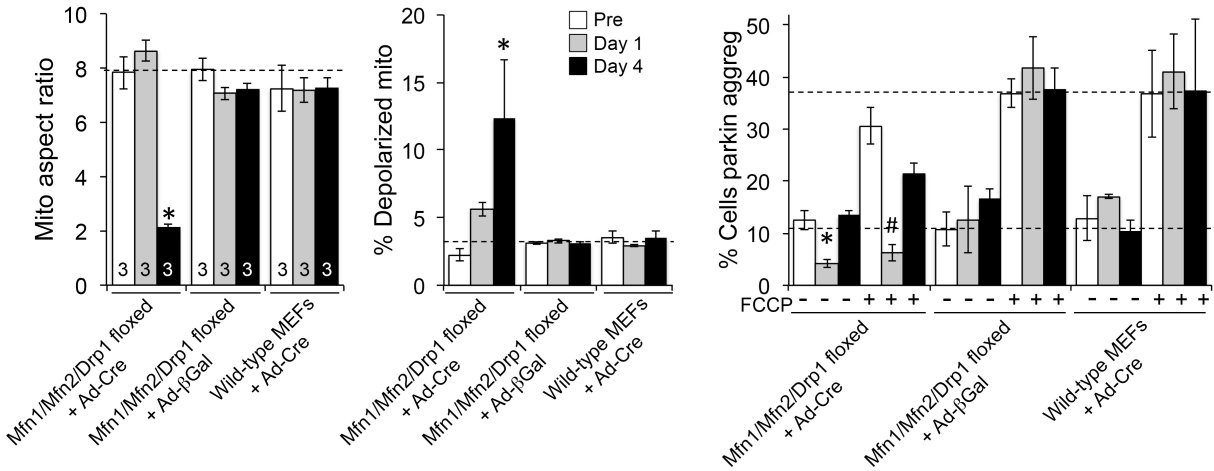

**Figure S2.** Studies to control for non-specific adenoviral effects on mitochondria, Related to Figure 2.

Mfn1/Mfn2/Drp1 triple floxed MEFs or control wild-type MEFs were infected with adenovirus encoding Cre-recombinase (Ad-Cre) or control  $\beta$ Gal at 100 MOI. Mitochondrial aspect ratio (left), polarization status (middle) and parkin aggregation (right) were measured before (Pre; white), 1 (grey) and 4 days (black) after Ad-virus application. Mfn1/Mfn2/Drp1 triple floxed MEFs + Ad-Cre data are re-plotted from Figure 2 for comparison. N=3 each treatment condition. Control conditions did not alter any read-out.

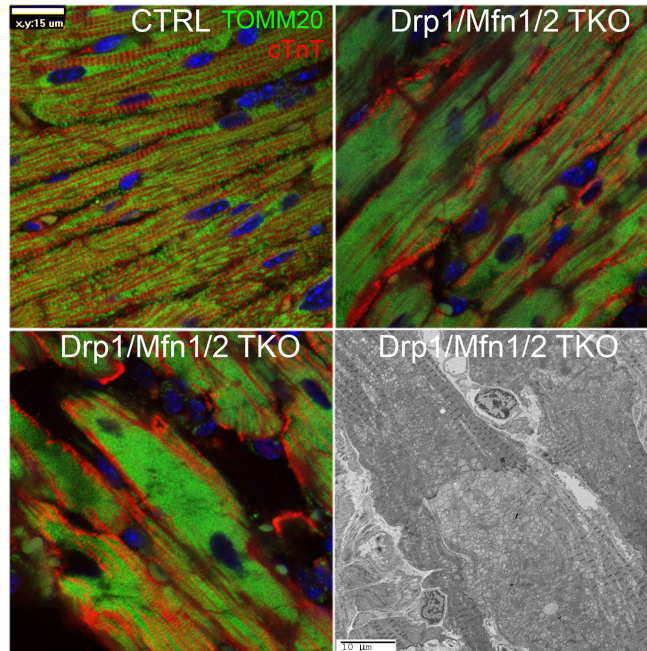

**Figure S3.** Sarcomere and mitochondrial distribution in *Mfn1/Mfn2/Drp1* TKO mouse hearts, Related to Figure 5.

Fluorescence microscopy of cardiac Troponin T (red) and TOMM20 (green) stained Ctrl (left upper) or *Mfn1/Mfn2/Drp1* TKO (right upper and left bottom) mouse hearts. Cardiac troponin T is an essential component of sarcomere; TOMM20 is a mitochondrial outer membrane protein. Right bottom, representative transmission electron micrograph of *Mfn1/Mfn2/Drp1* TKO mouse hearts.

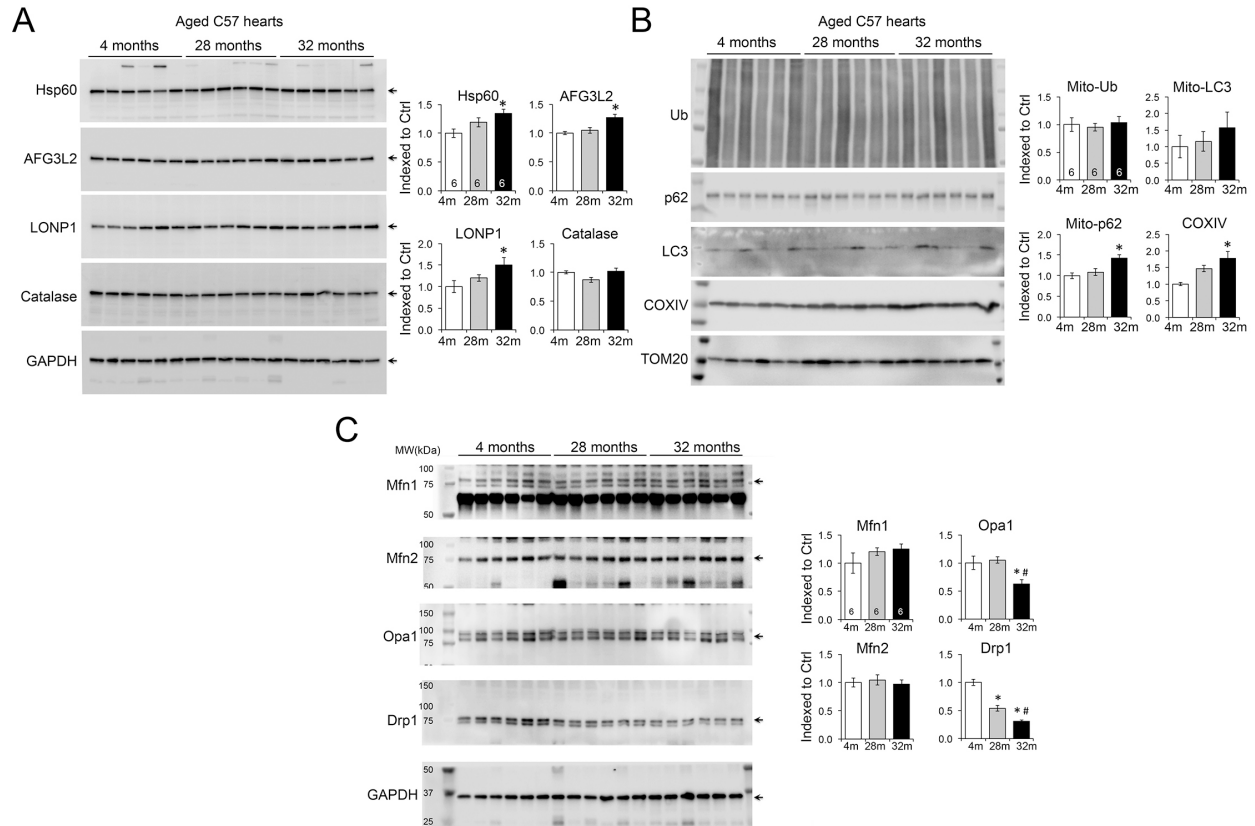

**Figure S4.** Proteostasis, mitophagy and abundance of mitochondrial dynamics proteins in genetically normal aged mouse hearts, Related to Figure 7.

- (A) Induction of the mitochondrial unfolded protein response. Samples are myocardial homogenates; GAPDH is loading control. \* is  $p < 0.05$  vs 4 month hearts (ANOVA).
- (B) Mitophagy proteins in cardiac mitochondrial fractions. TOM20 is loading control. \* is  $p < 0.05$  vs 4 month hearts (ANOVA).
- (C) Mitochondrial dynamics proteins in myocardial homogenates. GAPDH is loading control. \* is  $p < 0.05$  vs 4 month hearts; # is  $p < 0.05$  vs 28 month hearts (ANOVA).

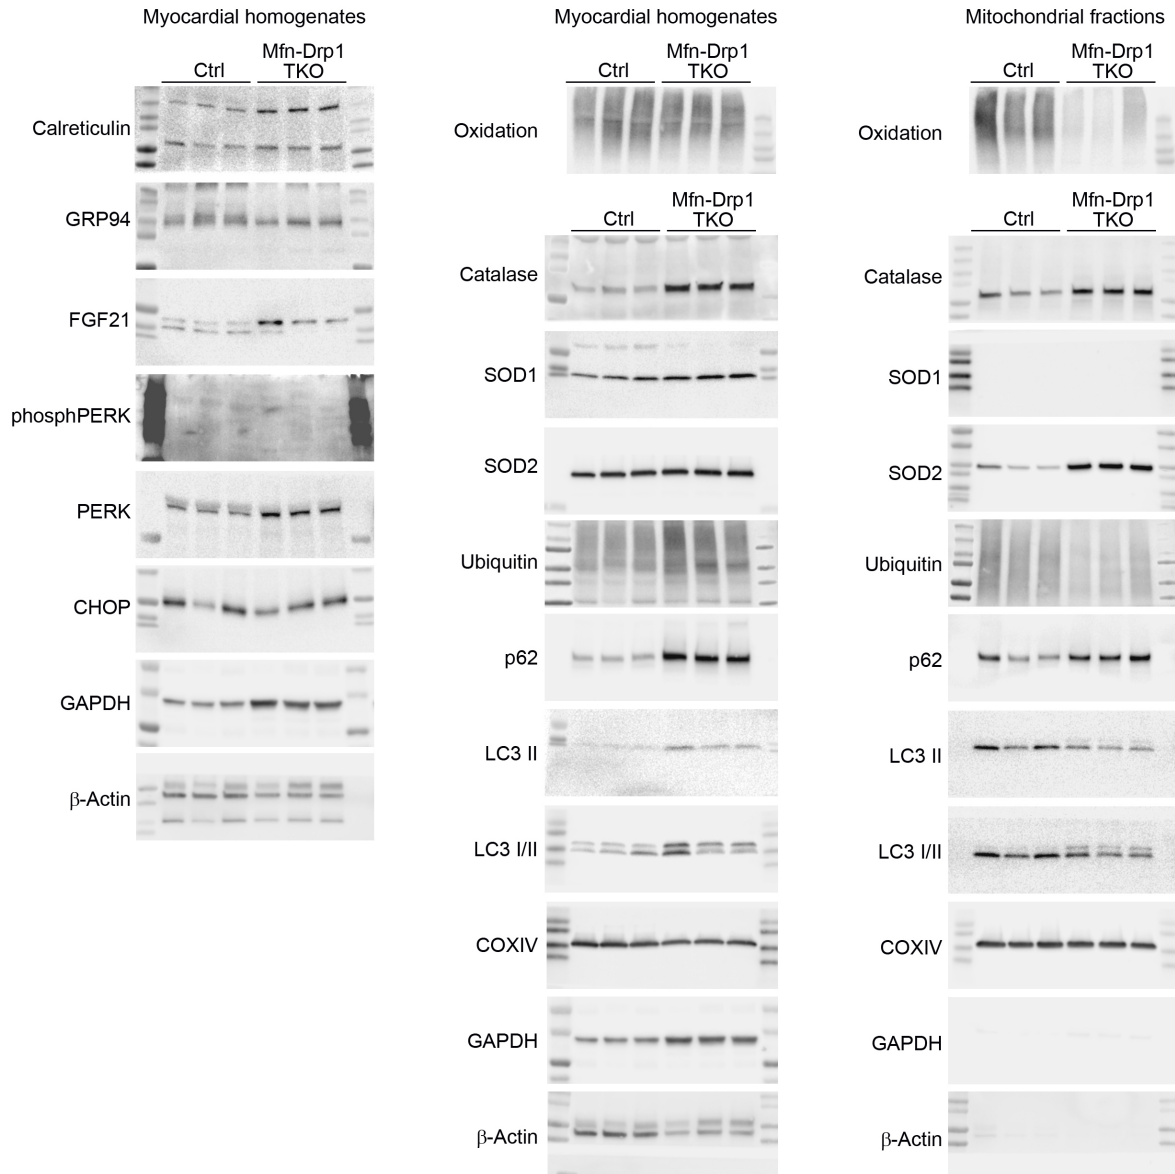

**Figure S5.** ER stress and autophagy/mitophagy markers in *Mfn1/Mfn2/Drp1* TKO mouse hearts, Related to Figure 7.

(Left) Protein levels of ER stress markers in *Mfn1/Mfn2/Drp1* TKO mouse hearts 16 weeks after gene ablation. (Middle and right) Autophagy and ROS markers in myocardial homogenates (middle) and mitochondria-enriched fractions (right) of *Mfn1/Mfn2/Drp1* TKO mouse hearts 16 weeks after gene ablation. These independent studies reproduce and extend findings in the time course results presented in Figure 7.

**Table S1.** *qPCR primer sequences, Related to Figures 3 and 6.*

| <b>Oligonucleotides</b>                           | <b>SOURCE</b>            | <b>IDENTIFIER</b> |
|---------------------------------------------------|--------------------------|-------------------|
| mtDNA forward primer: CCTATCACCCCTTGCCATCAT       | Chen et al., 2010        | N/A               |
| mtDNA Reverse primer: GAGGCTGTTGCTTGTGTGAC        | Chen et al., 2010        | N/A               |
| Nuclear DNA forward primer: ATGGAAAGCCTGCCATCATG  | Chen et al., 2010        | N/A               |
| Nuclear DNA Reverse primer: TCCTTGTTGTTTCAGCATCAC | Chen et al., 2010        | N/A               |
| Tfam (Mm00447485_m1)                              | Thermo Fisher Scientific | Cat#4331182       |
| PGC-1 $\alpha$ (Mm01208835_m1)                    | Thermo Fisher Scientific | Cat#4331182       |
| PGC-1 $\beta$ (Mm00504720_m1)                     | Thermo Fisher Scientific | Cat#4331182       |
| PPAR $\gamma$ (Mm01184322_m1)                     | Thermo Fisher Scientific | Cat#4331182       |
| ANP (Mm01255747_g1)                               | Thermo Fisher Scientific | Cat#4331182       |
| BNP (Mm01255770_g1)                               | Thermo Fisher Scientific | Cat#4331182       |
| SERCA (Mm01201431_m1)                             | Thermo Fisher Scientific | Cat#4331182       |
| GAPDH (Mm03302249_g1)                             | Thermo Fisher Scientific | Cat#4331182       |
